1 **Implication of exofacial thiol groups in the reducing**  
2 **activity of *Listeria monocytogenes***

3

4 **Guillaume Pillot, Anne Brillet-Viel, Hervé Prévost**

5 UMR1014 Secalim, Oniris, INRA, Université Bretagne-Loire, Nantes, F-44307, France

6

7 **Correspondence**

8 Dr. Hervé Prévost

9 E-mail address: [herve.prevast@oniris-nantes.fr](mailto:herve.prevast@oniris-nantes.fr)

10 Oniris, UMR INRA 1014, Secalim, Site de la Chantrerie, Oniris, Atlanpole / CS 40706, F-

11 44307 Nantes Cedex 3, France.

## 12 **Abstract**

13 *Listeria monocytogenes* growing in BHI in anaerobic condition leads a decrease of  
14 redox potential at pH7 ( $E_{h7}$ ) from 0 to -250 mV. An investigation of mechanisms involved in  
15 this reducing activity shows the implication of thiol groups located on the bacterial cell  
16 surface. Indeed, after reduction of media to -250 mV, only thiol-reactive reagents could  
17 restore the initial  $E_{h7}$  value. Moreover, the growth of *L. monocytogenes* in anaerobic condition  
18 is characterized by a reduction then acidification phases. This suggests a sensor mechanism of  
19 environmental  $E_{h7}$  to convert the metabolism way from the first phase to the second. Finally,  
20 the concentration of exofacial thiol still increase strongly during the acidification phase of *L.*  
21 *monocytogenes*, even after reach the minimal value of  $E_{h7}$ . These results suggest that  
22 maintaining the exofacial thiol (-SH) groups in a reduced state do not depend on an active  
23 mechanism. Thiol groups appear to be displayed by membrane proteins or cell wallbound  
24 proteins and may participate in protecting cells against oxidative stress.

25

## 26 **Introduction**

27 The oxido-reduction potential ( $E_h$ ) was shown to have different effects on  
28 microorganisms.  $E_h$  could be involved in gene expression, metabolism, physiology and so,  
29 could modify their growth capacity and end product formation.

30 The  $E_h$  measurement and monitoring are increasingly used as tools for the  
31 determination of bacterial activity in liquid media (Küsel and Dorsch, 2000), food products  
32 (Abraham et al., 2013; Alwazeer et al., 2003; Aubert et al., 2002), soils (Fiedler et al., 2007)  
33 and sediments (Schulz, 2000). Recent studies have emphasized that microbial cultures can  
34 generate a reducing activity during their growth depending on the redox potential of different

35 cellular compartments, and their ability to grow in the presence of dioxygen. (Prévost and  
36 Brillet-Viel, 2013).

37 However, the mechanisms involved in bacterial reducing capacities remained poorly  
38 understood. Two mechanisms have been described. The first correspond of the consumption  
39 of oxidant compounds or the release of reducing end-products during the energy generation  
40 metabolism. Indeed, to regenerate ATP, organic substrates are oxidized and dehydrogenated  
41 during the glycolysis and citric acid cycles producing reduced electron carriers (NADH,  
42 FADH<sub>2</sub>). Then, these carriers are re-oxidized by electron transfer in the case of respiratory  
43 metabolism to oxidants or to metabolic intermediates in fermentative metabolism. Thus, the  
44 metabolic pathways of energy production determine the reducing activity of microorganism to  
45 whether they are aerobic, facultative anaerobic or obligate anaerobic. Indeed, the terminal  
46 electron acceptor in respiration of strict aerobic bacteria is dioxygen, which restricts the range  
47 of redox potentials to values close to the oxidant values. Anaerobes meanwhile can reduce  
48 external terminal electron acceptors such as NO<sub>3</sub><sup>-</sup>, SO<sub>4</sub><sup>2-</sup>, Mn (III/IV) and Fe(III) which allow  
49 higher reducing capacities (until  $E_h = -600\text{mV}$ ). Finally, most of anaerobes can also produce  
50 strong reducing end-product such as H<sub>2</sub> (midpoint oxidation reduction potential,  $E_0' = -420$   
51 mV).

52 The second mechanism involved in bacterial reducing capacities which appears to be  
53 not linked to metabolism (proton motive force) or production of reducing end-product have  
54 been recently described in *Lactococcus lactis*. In this lactic acid bacteria, the reducing activity  
55 is due to thiol groups of cell surface proteins (Michelon et al., 2010).

56 The aim of this study was to identify the mechanism involved in the reducing activity  
57 of *Listeria monocytogenes*. Indeed, *L. monocytogenes* is a well-know food born pathogen  
58 with a high reducing activity. It is able to decrease the  $E_{h7}$  ( $E_h$  at pH 7) to -250 mV (Ignatova  
59 et al., 2008, 2010). However, the mechanism of this reducing activity was never studied

60

## 61 **Materials and Methods**

### 62 **Bacterial strains, culture conditions**

63 Three strains of *L. monocytogenes* were used in the present study. *L. monocytogenes*  
64 CIP 78.35 and EGDe (CIP 107776), initially isolated from veterinary and medical case with  
65 serotype 3 b and 1/2a respectively (Comi et al., 1997), were from the collection of Pasteur  
66 Institute of Paris (France) and SOR100, isolated from industrial process with unknown  
67 serotype, from the collection of LUBEM (Université de Bretagne Occidentale, France).  
68 Concentrated stock cell suspensions were stored at -80°C in Brain Heart Infusion (BHI, AES,  
69 France) supplemented with glycerol (10% v/v). Preculture of *L. monocytogenes* used as  
70 inocula were grown aerobically in 10 mL BHI broth during 12h at 37°C. As need, *L.*  
71 *monocytogenes* was enumerated on BHI agar plates incubated at 37°C during 24h.

72

### 73 **Redox potential and pH measurement.**

74 To prevent any uncontrolled  $E_h$  modification of the BHI broth due to reaction of  
75 Maillard during autoclaving, BHI media was sterilized by filtration at 0.2  $\mu\text{m}$  as described by  
76 Ignatova et al. (2009). Anaerobic condition was reached by nitrogen bubbling (Alphagaz 1,  
77 Air Liquide, France) during 5 hours. Then, BHI media was inoculated with  $1 \times 10^5$  cells·mL<sup>-1</sup>.  
78 All growth and reducing activity experiments were conducted in a 400-ml water-jacketed  
79 double-sidearm glass bioreactor (designed in Batailler labo, La Chapelle sur Erdre, France)  
80 especially customized with butyl rubber seal caps (Laboratoires Humeau, La Chapelle sur  
81 Erdre, France) to ensure air tightness. The redox potential ( $E_m$ ) and pH of culture were  
82 monitored at 37°C on BHI using a combined redox and pH electrode (InPro

83 3253SG/120/PT100, Mettler Toledo, Viroflay, France). The redox electrode was referred to  
84 the Ag/AgCl system. The electrode was connected on-line to a multi-channel interface  
85 (Absciss interface; Absciss, Fixin, France). In order to obtain better stabilization of measured  
86 redox potential, the electrode was polished with aluminum powder before each experiment  
87 and treated with HCl- and pepsin-based Electrode Cleaning Solution (Grosseron, Nantes,  
88 France) for 30 min once per week. A control measure was performed in tap water before each  
89 experiment (Abraham et al., 2013). The measured redox values collected via the interface  
90 were converted to  $E_h$  and  $E_{h7}$  values by using the software “Multi-bioreactors Central (3x  $E_h$ ,  
91 3xpH, 3xT°C)” (Absciss, Fixin, France) using the equation  $E_h = E_m + E_{ref}$ . In this equation  $E_h$   
92 is the redox potential compared to the standard hydrogen electrode,  $E_m$  the measured redox  
93 potential and  $E_{ref}$  the standard potential of the reference electrode. The standard potential of  
94 the reference Ag/AgCl electrode used in this study, was  $E_{ref} = 196.6$  mV at 37°C. To  
95 overcome the Nernstian effect of pH on the  $E_h$  value, the  $E_h$  was corrected to  $E_{h7}$ . The  $E_{h7}$   
96 which correspond to  $E_h$  if measured at pH 7 was calculated using the Leisner and Mirna  
97 equation,  $E_{h7} = E_h - [\alpha(7 - \text{pH})]$  (Leistner and Mirna, 1959) where  $\alpha$  is the correlation  
98 factor between pH and  $E_h$ . The  $\alpha$  correlation factor for BHI at 37°C determined in this study is  
99 identical to the previously published  $\alpha$  value for this medium (35 mV·pH·U<sup>-1</sup>, Ignatova et al.,  
100 2010).

## 101 **Filtration**

102 *L. monocytogenes* cells were harvested from culture by filtration using  
103 polyethersulfone 0.22  $\mu\text{m}$  Steritop-GP Filter Units (Millipore, Carrigtwohill, Ireland).  
104 Polyethersulfone membrane filters were used because to their low protein and drug binding  
105 properties. The resulting filtrate was degased using nitrogen bubbling during 3h before  $E_h$   
106 measurement.

## 107 **Neutralisation of thiol groups**

108 In order to determine whether thiol-containing proteins and polypeptide chains are  
109 exposed at the extracellular or cytoplasmic membrane surface, two thiol-reactive reagents, the  
110 N-Ethylmaleimide (NEM) and the *4-acetamido-4'-maleimidylstilbene-2,2'*- disulfonic acid  
111 (AMdiS) were used in this study. NEM is a membrane permeable compound able to react  
112 with intra- and extra-cellular thiol groups. AMdiS is a high polarity water soluble compound  
113 unable to cross the membrane and then can only react with the extracellular thiol groups.

114 NEM were obtained from Sigma (E3876, Sigma Aldrich, St Quentin Fallavier, France)  
115 and AMdiS from Invitrogen (A-485, Invitrogen, Carlsbad, USA). A stock solution of 1M  
116 NEM was prepared in methanol: water (3 : 1). The NEM was added to a final concentration of  
117 25 mM in culture media. A stock solution of 65.2 mM AMdiS was prepared in water and  
118 added in culture media to a 9 mM final concentration.

## 119 **Titration of accessible exofacial thiol groups**

120 The Ellman's method (Ellman and Lysko, 1979) using the 5,5'-dithiobis-2-  
121 nitrobenzoic acid (DTNB) was used to assay the exofacial thiol groups during bacterial  
122 growth. Because DTNB is a membrane impermeable compound, only the thiol groups located  
123 at the bacterial cell surface could react. Thiols react with DTNB, cleaving disulfide bond to  
124 give 3-thio-6-nitrobenzoate (TNB<sup>-</sup>), ionized into a yellow colored TNB<sup>2-</sup> dianion.

125 *L. monocytogenes* cells were harvested from the culture by centrifugation for 15 min  
126 at 3500g then suspended in 1mL of 0,1 M potassium phosphate buffer, 60 μM DTNB, (pH 8).  
127 The cell suspension was incubated 30 min at room temperature in the dark then centrifuged  
128 for 15 min at 3500g. The supernatants were filtered through a 0.45 μm membrane filter  
129 (Millipore). The concentration of exofacial thiol groups in the filtrate was measured by

130 spectrophotometer at  $A_{412}$  and the concentration was calculated using N-acetyl-L-cysteine  
131 standard curves (range: 5-100  $\mu\text{M}$ ).

## 132 **Statistical analysis**

133 The data analysis was performed using the statistical analysis software Statgraphics  
134 Centurion XVI (StatPoint Technologies, Inc., Warrenton, Virginie, USA). An analysis of  
135 variance (ANOVA) with  $\alpha \leq 0,05$  was used to compare the results.

136

## 137 **Results and discussion**

### 138 **Reducing activity of *L. monocytogenes***

139 The average evolutions (eight experiments) of  $E_{h7}$  and pH of *Listeria monocytogenes*  
140 SOR 100, EGDe and CIP 78.35 growing at 37°C on BHI under anaerobic conditions are  
141 presented figure 1. The kinetics of  $E_{h7}$  and pH during growth of *L. monocytogenes* shown two  
142 consecutive phases. The first corresponds to a reduction and a constant pH phase during the 5  
143 first hours of culture. This phase is characterised by the reduction of the media from initial  $E_{h7}$   
144 value (1 to 24 mV) to a minimal  $E_{h7}$  (-232 to -245 mV) depending of the strain. During the  
145 reduction phase, the pH remained stable at 7.3. After the reduction phase the  $E_{h7}$  remained  
146 stable until the end of the growth of *L. monocytogenes* but the pH decreased. The second  
147 phase corresponds to an acidification phase where the pH decreased from 7.3 to 5.9 between  
148 the 5<sup>th</sup> hour to the 13<sup>th</sup> hour of culture, then slowly to a final pH value around 5.5 at 48h.

149 The descriptive factors of reduction and acidification phases for the three strains are  
150 presented Table 1. The descriptive factors from the reduction and acidification kinetics were  
151 the initial and final values of  $E_{h7}$  and pH, the lag time and duration of each phase and the

152 mean rate of reduction and acidification. Any significant difference was shown between SOR  
153 100, EGDe and CIP 78.35 by statistical analysis for each parameter.

154 To date, the reducing activity of *L. monocytogenes* has been only studied in aerobic  
155 conditions (Ignatova et al., 2010). In fact, in aerobic condition, the reduction and acidification  
156 are not divided into two separated phases and occur in the same time. Moreover, the final  
157 value of  $E_{h7}$  is different between the two atmospheres, with a value of  $-179 \pm 38$  mV in  
158 aerobic condition against  $-245 \pm 23$  mV in anaerobic condition both independently of the  
159 culture medium and the initial  $E_{h7}$  value. This difference of minimal  $E_{h7}$  value is certainly due  
160 to the presence for the first case of dissolved dioxygen in the media, known to be a high  
161 oxidative compound. In addition, the only study on the reducing activity of another bacterium,  
162 *L. lactis*, allow to compare our results to this Lactic Acid Bacteria (Michelon et al., 2010).  
163 Comparatively, the reduction phase of *L. lactis* occur later than *L. monocytogenes* with a  $E_{h7}$   
164 value higher, while the acidification phase starts sooner with a pH value at 48h lower.

## 165 **Role of the cell in the $E_h$ decrease**

166 In order to study the cell-linked reducing activity, the  $E_{h7}$  of *L. monocytogenes* cultures at the  
167 end of the reducing phase (ERP), cell-free ERP filtrate and sterile BHI were compared (Figure  
168 2). The  $E_{h7}$  value measured in sterile BHI were range from 10 to -40 mV. The *L.*  
169 *monocytogenes* culture reduced the medium to -240 mV at ERP. The statistical analysis show  
170 that for the three *L. monocytogenes* strains,  $E_{h7}$  of cell-free ERP filtrate and sterile BHI are not  
171 significantly different ( $\alpha \leq 0,05$ ). These results shown (i) that reducing activity of *L.*  
172 *monocytogenes* is not due to production of reducing end-products from metabolism released  
173 in the medium (ii) that the restoration to the initial  $E_{h7}$  results from the cell removing from the  
174 medium. So, the reducing activity of *L. monocytogenes* culture is mediated by the whole cells.



175 A same observation had been made on *L. lactis* where the reducing activity was mediated by  
176 the cells (Michelon et al., 2010).

177

## 178 **Implication of Thiol groups in the decrease in $E_h$**

179 Having refuted the hypothesis of reducing molecules excreted by the cell, we have  
180 investigated the thiol cellular mechanism. To study the role of thiol compounds, two reagents,  
181 N-Ethylmaleimide (NEM) and 4-acetamido-4'-maleimidylstilbene-2,2'-disulfonic acid  
182 (AMdiS) were selected. These reagents contain maleimide, which can bind with thiol groups  
183 in an irreversible reaction to suppress there activity in redox equilibrium. Due to its neutrality,  
184 NEM can penetrate the cytoplasmic membrane and neutralized intra- and extra-cellular thiol  
185 compounds. Contrariwise, AMdiS which is negatively charged cannot diffuse across the  
186 cellular membrane. Thus, AMdiS can only react with external thiol groups. As shown in the  
187 Figure 2, the addition of NEM or AMdiS to a media reduced by *L. monocytogenes* increase  
188 the  $E_{h7}$  to its initial value. Therefore the experiment with NEM show that thiol groups are  
189 engaged in reducing activity, while AMdiS indicate their exofacial localization.

190 Thus, we can assume that these ERP values are likely the result of an equilibrium of thiol  
191 redox compounds as glutathione ( $E_0' = -240$  mV), thioredoxin ( $E_0' = -195$  to  $-270$  mV) or  
192 protein carrying cysteine ( $E_0' = -340$  mV) (Mössner et al., 1999; Schafer et al., 2001; Sober  
193 et al., 1968). Bioinformatics sequence analysis of *Listeria monocytogenes* EGD-e has  
194 identified five proteins with a thioredoxin CXXC motif, may play a role in reducing  
195 mechanisms. Among these proteins, there are four proteins with a T-X-X-C pattern and one  
196 with a C-X-X-T pattern. Analysis of these proteins have identified as a thiol peroxidase, a  
197 peroxiredoxin, a ribonucleotide reductase and glutathione peroxidase.

198 **Evolution of exofacial thiol groups concentration during growth of**  
199 ***L. monocytogenes***

200 The evolution of cell and exofacial thiol concentrations during the culture of *L.*  
201 *monocytogenes* SOR 100, EGDe and CIP 78.35 in anaerobic BHI media are represented Fig  
202 3A. The bacterial population and exofacial thiol concentration increase simultaneous  
203 exponentially. Indeed, during the reduction phase, the concentration of exofacial thiols  
204 increase slowly from 0 to  $20 \pm 5 \mu\text{M}$  while during the acidification phase the concentration  
205 increases to a maximum of  $82 \pm 22 \mu\text{M}$ . Thus, the concentration of exofacial thiol still  
206 increases after the end of reduction phase, unlike *L. lactis* (Michelon et al., 2010) where the  
207 concentration stays stable at the end of reduction at  $12 \mu\text{M}$  until the end of growth.

208 However, the ratio of thiol concentration per cell (Fig. 3B) is stable during the  
209 reduction phase with a value of 1 to 5 femtomol/CFU and decrease during the acidification  
210 phase to a final value of 30 attomol/CFU. Thus, the ratio is divided by a 100 factor during the  
211 acidification phase.

212 The fig 3C shows the correlation between thiol concentration and  $E_{h7}$  value of the  
213 media. During the reduction phase, the  $E_{h7}$  of media decrease proportionally to the increase of  
214 exofacial thiol concentration. However, when the value of  $20 \mu\text{M}$  of thiol is reached, the  $E_{h7}$   
215 of media stay stable at a minimum of  $-250\text{mV}$  while the thiol concentration still increases to a  
216 range from 70 to  $88 \mu\text{M}$  at 9h. This suggests that the Eh was stabilized when the  
217 concentration of exofacial thiol molecules in the media reach a limit value ( $\approx 20 \mu\text{M}$ ). From  
218 this concentration the thiol–disulfide redox couple establish a more intense current with the Pt  
219 electrode than other redox couples in the culture medium (Michelon et al., 2010; Peiffer et al.,  
220 1992).

221 In contrast with *L. lactis* (Michelon et al., 2010), the concentration of exofacial thiol of  
222 *L. monocytogenes* still rises strongly until the stationary phase, while the ratio of thiol per cell  
223 decrease. These results suppose a conversion of the metabolic ways to reduce the production  
224 of exofacial thiol when the limit value is reached. Although the reducing activity was not  
225 directly related to metabolic activity, reducing equivalents such as NADH or thioredoxin are  
226 likely to be involved in the formation of exofacial thiol groups during the reducing phase.  
227 These results let us suppose a sensor mechanism inducing a decrease of thiol compounds  
228 production when a minimum of environmental  $E_{h7}$  value is reached. This implies a sensor  
229 mechanism inducing the modification in the gene expression of the metabolism. In fact, it's  
230 known that bacteria are able to sense the extra or the intracellular environmental redox state  
231 with redox sensing mechanisms related to the thiol–disulfide balance and adapt their cell  
232 activity (Green and Paget, 2004). Williams et al., (2005) have shown the sequence of 2 sensor  
233 genes of environmental stress in *Listeria monocytogenes*, Lmo1948/Lmo1947, homolog of a  
234 ResDE system of *Bacillus subtilis*. This latter is composed of a membrane sensor and a  
235 cytoplasmic regulator and is involved in the regulation of aerobic and anaerobic metabolism  
236 (Duport et al., 2006; Zigha et al., 2007). In addition, another study showed a gene family of  
237 Crp / Fnr and their importance in resistance to oxidative stress by *Listeria* mutation targeted  
238 genes (Lampidis et al., 1994; Uhlich et al., 2006). The identification of proteins located on the  
239 extracellular surface and involved in the sensor mechanism and the decrease of  $E_h$  would be  
240 of interest for increasing our understanding of the mechanisms involved as well as the  
241 reducing activity of *L. monocytogenes*. Indeed, the systematic reduction of the extracellular  
242 microenvironment may participate in protecting cells against oxidative stress and others  
243 stress. Indeed, an overexpression of *trxB* gene encoding the thioredoxin reductase have been  
244 shown in *Listeria monocytogenes* EGD-e at low temperature growth (Liu et al., 2002).  
245 Another recent study demonstrated the presence and synthesis of glutathione in *Listeria*

246 *monocytogenes* following stress caused by gallic acid and nisin, both molecules with  
247 antimicrobial activities (Moro et al., 2012). Finally, it could also be able to play a role in some  
248 demonstrated thiol-dependent mechanisms, as the folding of exoproteins or the virulence by  
249 the action of listeriolysin (Leimeister-Wachter and Chakraborty, 1989).

250

## 251 **Conclusions**

252 In conclusion, the present study have shown the role of exofacial thiol in the reducing  
253 activity of *L. monocytogenes* in anaerobiosis and ruled out the implication of reducing end-  
254 products or the consumption of oxidizing compounds, as is mainly observed for other  
255 bacterial species. The decrease of  $E_h$  during the reducing activity was directly connected to  
256 the increase of cell density and concentration of thiol groups carrying on proteins on the  
257 bacterial cell surface. Exofacial thiol could establish a reducing microenvironment around the  
258 cell and might be used as ligands to coordinate such redox-responsive clusters (Green and  
259 Paget, 2004).

260

## 261 **Acknowledgments**

262 This work has been done as in part of the FoodRedox research grant (ANR/ALID  
263 2012-2015). We would like to thank all members of FoodRedox for their technical aid.

264 **References**

265

266 Abraham, S., Cachon, R., Jeanson, S., Ebel, B., Michelon, D., Aubert, C., Rojas, C., Feron,

267 G., Beuvier, E., Gervais, P., Coninck, J., 2013. A procedure for reproducible

268 measurement of redox potential (Eh) in dairy processes. Dairy Sci. Technol. 93, 675-

269 690. doi:10.1007/s13594-013-0134-5

270 Alwazeer, D., Delbeau, C., Diviès, C., Cachon, R., 2003. Use of redox potential modification

271 by gas improves microbial quality, color retention, and ascorbic acid stability of

272 pasteurized orange juice. Int. J. Food Microbiol. 89, 21–29. doi:10.1016/S0168-

273 1605(03)00125-9

274 Aubert, C., Cappelle, N., Jeanson, S., Eckert, H., Divies, C., Cachon, R., 2002. Le potentiel

275 d’oxydoréduction et sa prise en compte dans les procédés d’utilisation des bactéries

276 lactiques. Sci. Aliments 22, 177–187. doi:10.3166/sda.22.177-187

277 Comi, G., Cocolin, L., Cantoni, C., Manzano, M., 1997. A RE-PCR method to distinguish

278 *Listeria monocytogenes* serovars. FEMS Immunol. Med. Microbiol. 18, 99–104.

279 doi:10.1111/j.1574-695X.1997.tb01033.x

280 Duport, C., Zigha, A., Rosenfeld, E., Schmitt, P., 2006. Control of enterotoxin gene

281 expression in *Bacillus cereus* F4430/73 involves the redox-sensitive ResDE signal

282 transduction system. J. Bacteriol. 188, 6640–6651. doi:10.1128/JB.00702-06

283 Ellman, G., Lysko, H., 1979. A precise method for the determination of whole blood and

284 plasma sulfhydryl groups. Anal. Biochem. 93, 98–102.

285 Fiedler, S., Vepraskas, M.J., Richardson, J.L., 2007. Soil Redox Potential: Importance, Field

286 Measurements, and Observations, in: Donald L. Sparks (Ed.), Advances in Agronomy.

287 Academic Press, pp. 1–54.

- 288 Green, J., Paget, M.S., 2004. Bacterial redox sensors. *Nat. Rev. Microbiol.* 2, 954–966.  
289 doi:10.1038/nrmicro1022
- 290 Ignatova, M., Leguerinel, I., Guilbot, M., Prévost, H., Guillou, S., 2009. Modelling the effect  
291 of the redox potential and pH of heating media on *Listeria monocytogenes* heat  
292 resistance. *J. Appl. Microbiol.* 105, 875–883. doi: 10.1111/j.1365-2672.2008.03812.x
- 293 Ignatova, M., Prévost, H., Leguerinel, I., Guillou, S., 2010. Growth and reducing capacity of  
294 *Listeria monocytogenes* under different initial redox potential. *J. Appl. Microbiol.* 108,  
295 256–265. doi:10.1111/j.1365-2672.2009.04426.x
- 296 Ignatova, M., Guével, B., Com, E., Haddad, N., Rossero, A., Bogard, P., Prévost, H., Guillou,  
297 S., 2013. Two-dimensional fluorescence difference gel electrophoresis analysis of  
298 *Listeria monocytogenes* submitted to a redox shock. *J. Proteomics* 79, 13–27.  
299 doi:10.1016/j.jprot.2012.11.010
- 300 Küsel, K., Dorsch, T., 2000. Effect of Supplemental Electron Donors on the Microbial  
301 Reduction of Fe(III), Sulfate, and CO<sub>2</sub> in Coal Mining–Impacted Freshwater Lake  
302 Sediments. *Microb. Ecol.* 40, 238–249. doi:10.1007/s002480000065
- 303 Lampidis, R., Gross, R., Sokolovic, Z., Goebel, W., Kreft, J., 1994. The virulence regulator  
304 protein of *Listeria ivanovii* is highly homologous to PrfA from *Listeria*  
305 *monocytogenes* and both belong to the Crp-Fnr family of transcription regulators. *Mol.*  
306 *Microbiol.* 13, 141–151. doi:10.1111/j.1365-2958.1994.tb00409.x
- 307 Leimeister-Wachter, M., Chakraborty, T., 1989. Detection of listeriolysin, the thiol-dependent  
308 hemolysin in *Listeria monocytogenes*, *Listeria ivanovii*, and *Listeria seeligeri*. *Infect.*  
309 *Immun.* 57, 2350–2357.
- 310 Leistner, L., Mirna, A., 1959. Das redoxpotential von Pökellaken. *Fleischwirtsch.* 659–666.

- 311 Liu, S., Graham, J.E., Bigelow, L., Morse, P.D., Wilkinson, B.J., 2002. Identification of  
312 *Listeria monocytogenes* Genes Expressed in Response to Growth at Low Temperature.  
313 Appl. Environ. Microbiol. 68, 1697–1705. doi:10.1128/AEM.68.4.1697-1705.2002
- 314 Michelon, D., Abraham, S., Ebel, B., De Coninck, J., Husson, F., Feron, G., Gervais, P.,  
315 Cachon, R., 2010. Contribution of exofacial thiol groups in the reducing activity of  
316 *Lactococcus lactis*. FEBS J. 277, 2282–2290. doi:10.1111/j.1742-4658.2010.07644.x
- 317 Moro, C.G.D., Shultz, C., Gelinski, J.M.L.N., Locatelli, C., 2012. Increase of Glutathione by  
318 *Listeria monocytogenes* scott A Cm<sup>r</sup> Em<sup>r</sup> When It Is Challenged by Gallic Acid and  
319 Nisin. J. Food Res. 1, 35-43. doi:10.5539/jfr.v1n4p35
- 320 Mössner, E., Huber-Wunderlich, M., Rietsch, A., Beckwith, J., Glockshuber, R., Åslund, F.,  
321 1999. Importance of Redox Potential for the in Vivo Function of the Cytoplasmic  
322 Disulfide Reductant Thioredoxin from *Escherichia coli*. J. Biol. Chem. 274, 25254–  
323 25259. doi:10.1074/jbc.274.36.25254
- 324 Prévost, H., Brillet-Viel, A., 2013. Ecology of Bacteria and Fungi in Foods, Influence of  
325 Redox Potential, in: Encyclopedia of food microbiology. CA. Batt (edt ) Elsevier Ltd,  
326 pp. 595-601.
- 327 Schafer, F.Q., Buettner, G.R., others, 2001. Redox environment of the cell as viewed through  
328 the redox state of the glutathione disulfide/glutathione couple. Free Radic. Biol. Med.  
329 30, 1191–1212.
- 330 Schulz, H.D., 2000. Redox Measurements in Marine Sediments, in Redox: Schüring, D.J.,  
331 Schulz, P.D.H.D., Fischer, P.D.W.R., Böttcher, P.D.J., Duijnsveld, D.W.H.M. (Eds.),  
332 Springer Berlin Heidelberg, pp. 235–246.
- 333 Sober, H.A., Harte, R.A., Sober, E.K., 1968. Handbook of biochemistry: Selected data for  
334 molecular biology. Chemical Rubber Company CRC, Cleveland, Ohio.

- 335 Uhlich, G.A., Wonderling, L.D., Luchansky, J.B., 2006. Analyses of the putative Crp/Fnr  
336 family of transcriptional regulators of a serotype 4b strain of *Listeria monocytogenes*.  
337 Food Microbiol. 23, 300–306. doi:10.1016/j.fm.2005.03.007
- 338 Williams, T., Bauer, S., Beier, D., Kuhn, M., 2005. Construction and Characterization of  
339 *Listeria monocytogenes* Mutants with In-Frame Deletions in the Response Regulator  
340 Genes Identified in the Genome Sequence. Infect. Immun. 73, 3152–3159.  
341 doi:10.1128/IAI.73.5.3152-3159.2005
- 342 Zigha, A., Rosenfeld, E., Schmitt, P., Duport, C., 2007. The Redox Regulator Fnr Is Required  
343 for Fermentative Growth and Enterotoxin Synthesis in *Bacillus cereus* F4430/73. J.  
344 Bacteriol. 189, 2813–2824. doi:10.1128/JB.01701-06
- 345
- 346



347 Figures legends

348 Fig. 1 : Evolution of  $E_{h7}$  (—) and pH (---) during culture of *Listeria monocytogenes* SOR 100  
349 (■), EGDe (▲) and CIP 78.35 (◆) under anaerobic conditions ( $N_2$ ). Average curves of 8  
350 experiments are shown (SD respectively for SOR 100, EGDe and CIP 78.35 are for  $E_{h7} = \pm$   
351 35 / 47 / 26 mV and pH =  $\pm$  0.17 / 0.15 / 0.10 pH units)

352

353 Fig. 2 : Histogram of  $E_{h7}$  values before inoculation, after reduction, after filtration, and after  
354 addition of NEM or AMdiS in culture, for *Listeria monocytogenes* SOR 100, EGDe and CIP  
355 78.35. For each treatment, the columns shown the average of a triplicate. The statistical  
356 analysis was performed with ANOVA ( $P=0.05$ ) and significant difference are show by ○ and  
357 △ above the columns.

358

359 Fig. 3: Evolution in the concentration of exofacial thiol groups during reduction by *L.*  
360 *monocytogenes* SOR 100 (■), EGDe (▲) and CIP 78.35 (◆) under anaerobic conditions ( $N_2$ ).  
361 (A) Evolution of exofacial thiol concentration (histograms) and growth (curves). (B)  
362 Evolution of the rate of mole of exofacial thiol per CFU. (C)  $E_{h7}$  evolution depending on the  
363 exofacial thiol concentration. Phase 1 is the reduction phase while Phase 2 is the acidification  
364 phase.

365

366 Table 1 : Descriptive parameters of reduction and acidification phases of the growth of *L.*  
 367 *monocytogenes* and *L. lactis* in anaerobic conditions. ANOVA (P=0,05) was used to statistical  
 368 analysis. Each value is an average of 8 experiments. Any difference was observed between  
 369 SOR 100, EGDe and CIP 78.35.

|                                                   | <i>Listeria monocytogenes</i> in BHI |              |              | <i>L. lactis ssp cremoris</i>                    |
|---------------------------------------------------|--------------------------------------|--------------|--------------|--------------------------------------------------|
|                                                   | SOR 100                              | EGDe         | CIP 78.35    | <i>TIL 46</i> in MRS*<br>(Michelon et al., 2010) |
| Initial Eh <sub>7</sub> (mV)                      | 1 ± 70                               | 17 ± 92      | 24 ± 102     | 148 ± 19                                         |
| Lag time of reduction (h)                         | 0.7 ± 1.03                           | 0.75 ± 1.47  | 0.53 ± 0.57  | 1.84 ± 0.1                                       |
| Rate of reduction (mV.h <sup>-1</sup> )           | -96 ± 57                             | -90 ± 88     | -100 ± 95    | -130                                             |
| Time of reduction (h)                             | 3.6 ± 1.1                            | 4 ± 1        | 4.3 ± 1.5    |                                                  |
| Final Eh <sub>7</sub> (mV)                        | -245 ± 23                            | -232 ± 34    | -233 ± 21    | -219 ± 1                                         |
| initial pH                                        | 7.31 ± 0.03                          | 7.31 ± 0.04  | 7.34 ± 0.05  | 6.37 ± 0.06                                      |
| Lag time of acidification (h)                     | 4.9 ± 1.5                            | 5.5 ± 1.02   | 6.6 ± 2.9    | 3.43 ± 0.04                                      |
| Rate of acidification (pH units.h <sup>-1</sup> ) | -0.36 ± 0.27                         | -0.38 ± 0.18 | -0.38 ± 0.21 | -0.13                                            |
| Time of acidification (h)                         | 4.31 ± 2.75                          | 4.5 ± 2.2    | 4.51 ± 2.52  |                                                  |
| Final pH (pH units)                               | 5.88 ± 0.07                          | 5.86 ± 0.08  | 5.90 ± 0.09  | 5.97 ± 0.06                                      |
| pH at 48h (pH units)                              | 5.54 ± 0.14                          | 5.49 ± 0.07  | 5.69 ± 0.07  | 4.57 ± 0.06                                      |

370

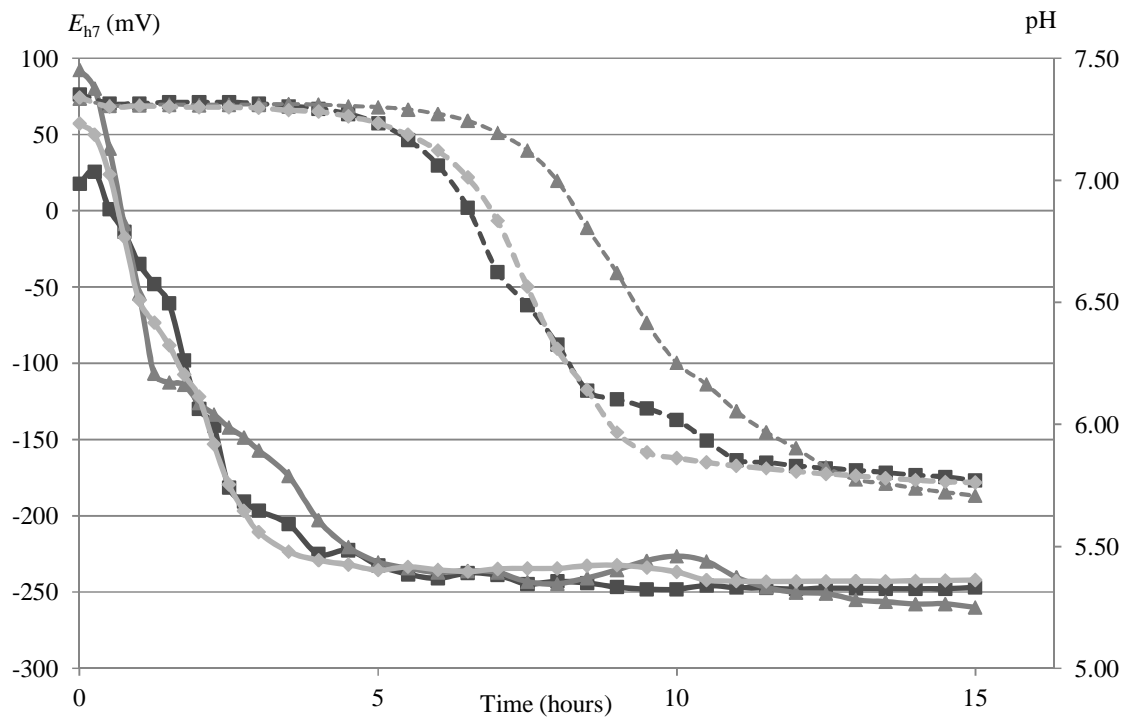

Figure 1

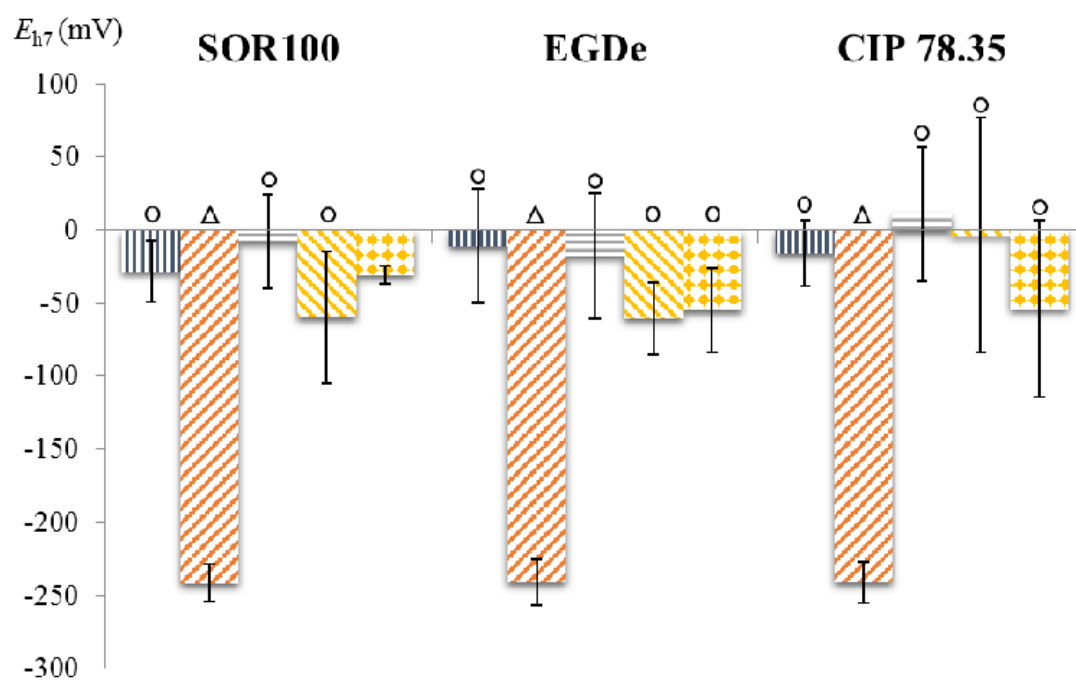

Figure 2

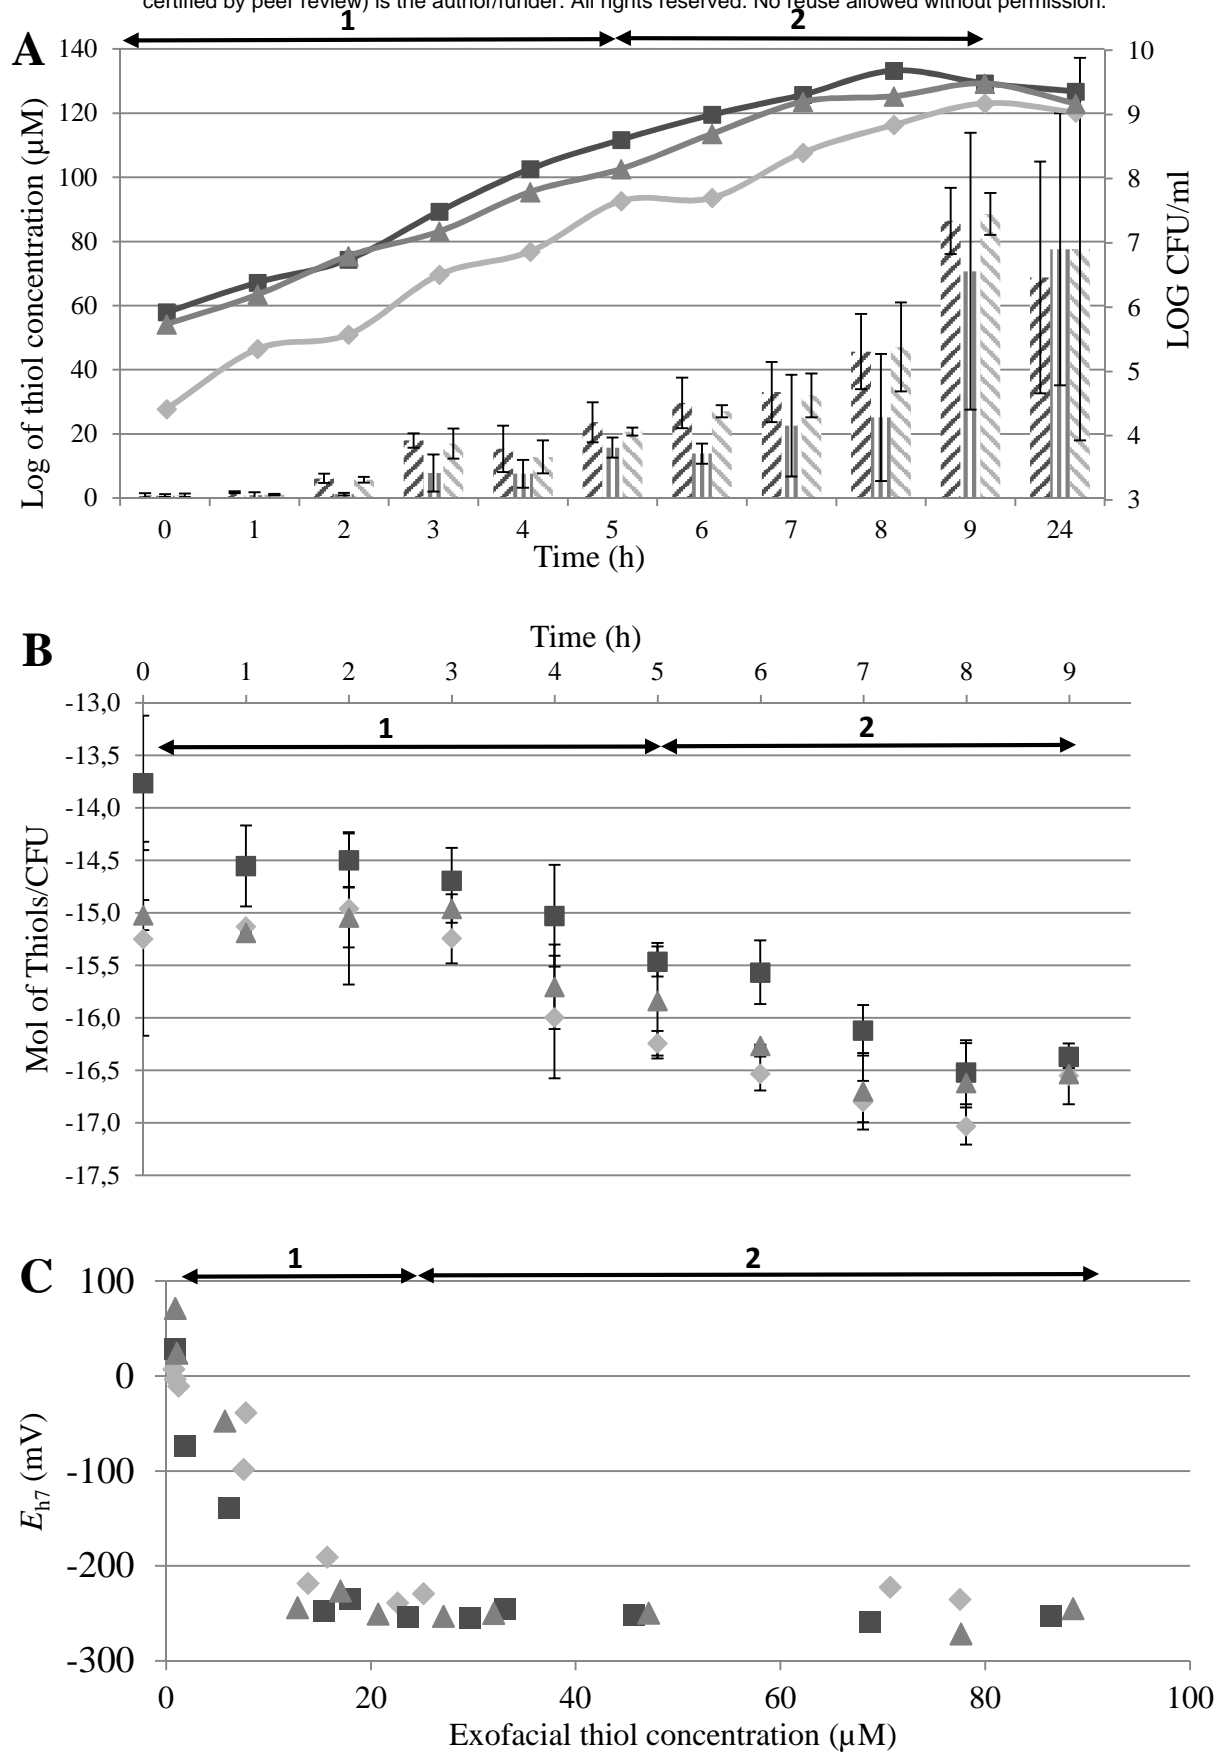

Source: https://www.biorxiv.org/content/10.1101/353409v1.full.pdf
